# Supplementary material
Source: PubMed Central journal article supplement (PMC11184497)
Supplement: jama-e248531-s004.pdf [file jama-e248531-s004.pdf]

## **Data Sharing Statement**

### **Data**

**Data available:** No

### **Additional Information**

**Explanation for why data not available:** Select anonymized data is made available upon request to the corresponding author.
